# Supplementary material
Source: PubMed Central journal article supplement (PMC7739924)
Supplement: rspb20202561_review_history.pdf [file rspb20202561_review_history.pdf]

## A single heat-stress bout induces rapid and prolonged heat acclimation in the California mussel, *Mytilus californianus*

Nicole E. Moyen, Rachel L. Crane, George N. Somero and Mark W. Denny

### Article citation details

*Proc. R. Soc. B* **287**: 20202561.

<http://dx.doi.org/10.1098/rspb.2020.2561>

### Review timeline

Original submission: 13 October 2020  
Revised submission: 16 November 2020  
Final acceptance: 17 November 2020

Note: Reports are unedited and appear as submitted by the referee. The review history appears in chronological order.

## Review History

### RSPB-2020-2561.R0 (Original submission)

#### Review form: Reviewer 1

#### Recommendation

Accept with minor revision (please list in comments)

**Scientific importance: Is the manuscript an original and important contribution to its field?**  
Excellent

**General interest: Is the paper of sufficient general interest?**  
Excellent

**Quality of the paper: Is the overall quality of the paper suitable?**  
Excellent

**Is the length of the paper justified?**  
Yes

**Should the paper be seen by a specialist statistical reviewer?**  
No

**Do you have any concerns about statistical analyses in this paper? If so, please specify them explicitly in your report.**

No

**It is a condition of publication that authors make their supporting data, code and materials available - either as supplementary material or hosted in an external repository. Please rate, if applicable, the supporting data on the following criteria.**

**Is it accessible?**

Yes

**Is it clear?**

Yes

**Is it adequate?**

Yes

**Do you have any ethical concerns with this paper?**

No

### **Comments to the Author**

This manuscript presents a well-conducted study of heat hardening in the intertidal mussel *Mytilus* on the California coast. The results of the study are highly relevant for making accurate predictions about the effects of heat waves on mussel populations. Additionally, the study presents an important lesson for any researchers interested in heat hardening, namely that there can be significant variation in heat hardening phenology depending on initial heat exposure.

Overall, the manuscript is well written and the study and data are presented in an ideal way for readers to follow. Fig 2A could potentially be a supplementary figure, but I am OK with leaving it in the main document of the paper as the number of figures is small.

Below I make some comments intended to help the paper be maximally impactful following publication.

Introduction Paragraph 1: I found the first paragraph to be a bit light on citations of recent examples that specifically address the importance of infrequent, but extreme, heat waves. I'd like to see the authors add more of those citations in this first paragraph. For example, Stillman (2019) presents a highly relevant review summarizing the critical importance of thermal extremes, or heat waves, in making predictions regarding responses to climate change. (<https://journals.physiology.org/doi/full/10.1152/physiol.00040.2018>). Brietenbach et al (2020) present a highly relevant concept about how the phenology of heat waves have differential impacts on phenotype (<https://royalsocietypublishing.org/doi/10.1098/rspb.2020.0992>). And I am presume that the authors will find additional citations that are likely to be equally relevant.

Introduction Paragraph 2: The authors use the term "heat hardening" as a keyword, but do not use this term anywhere in the manuscript, which is surprising, because long-term heat hardening is exactly what they demonstrate in their study. I would like to see the authors incorporate "heat hardening" into the text of their manuscript as this usage most precisely describes their study. I was surprised that the authors did not, in the second paragraph of the introduction, mention at least some of the recent literature showing heat hardening (albeit not in *Mytilus*).

Line 97 - how much shellfish diet was fed at each feeding? Is there a way to assess whether the mussels were getting a "natural" amount of food during the aquarium holding period?

Line 105-108 - When I first read this section, I wanted to see additional information here about the conditions of the heat exposures. I found the information after the subsequent paragraph starting

at line 135. I suggest that the authors move the intervening paragraph (starting at line 113) to the discussion as this paragraph better fits a justification for the study design in terms of interpretation of results than a description of how the study was conducted.

Line 178. Move this sentence to the end of the statistical analysis section.

Paragraph at Line 227. In the first sentence, the "As shown in Fig. 3" is not needed - just cite Fig 3 at the end of the sentence. The second sentence is a methods sentence as no results are presented. The third sentence should also cite Fig. 3.

In the conclusions I'd like to challenge the authors to go a bit broader in terms of the importance of this study for considering the best ways in which heat hardening should be accounted for in experimental work and in making inferences about responses of populations to heat waves and climate change. The work, as presented, has implications more broadly than mussels alone.

## Review form: Reviewer 2 (Urtzi Enriquez-Urzelai)

### **Recommendation**

Accept with minor revision (please list in comments)

**Scientific importance: Is the manuscript an original and important contribution to its field?**

Good

**General interest: Is the paper of sufficient general interest?**

Excellent

**Quality of the paper: Is the overall quality of the paper suitable?**

Excellent

**Is the length of the paper justified?**

Yes

**Should the paper be seen by a specialist statistical reviewer?**

No

**Do you have any concerns about statistical analyses in this paper? If so, please specify them explicitly in your report.**

Yes

**It is a condition of publication that authors make their supporting data, code and materials available - either as supplementary material or hosted in an external repository. Please rate, if applicable, the supporting data on the following criteria.**

**Is it accessible?**

Yes

**Is it clear?**

Yes

**Is it adequate?**

No

## Do you have any ethical concerns with this paper?

No

### Comments to the Author

In this study, the authors evaluate the patterns of thermal tolerance gain and loss of a sessile species (*Mytilus californianus*) after exposure to sublethal temperatures (25, 30 and 35°C). Further, they combine their results with long-term monitoring of operative temperatures in the field to put results in a “realistic” context. The authors show that exposure to heat pulses of 30 and 35°C leads to increased survival to later pulses of 40°C, but that temporal dynamics differ: 30°C heat-stress bouts increase survival between days 1 and 14, whereas 35°C bouts increased survival between days 2 and 28.

Overall, this is a beautiful piece of research. The general topic and research question are very timely – of interest for researchers in many fields – and clearly explained in the manuscript. The experimental design and statistical analyses are appropriate and allows the authors to answer the question being posed. However, I would like the authors to clarify a few points (all of them minor):

1) The order in which experimental groups (and sublethal temperatures) were tested should be better explained. Most experimental procedures are sufficiently explained in the text, but it is important to clarify how individual mussels were assigned to experimental groups. Apparently, the authors collected mussels from January to June. If I understand correctly, this means that they collected experimental groups of ~20 individuals gradually along those months. I am sure that the authors did not assign all the early groups to one sublethal temperature treatment (e.g. 25°C) and all late groups to another treatment (e.g. 35°C): this would have blurred results with potential seasonal acclimation from January to June. The authors should clarify how groups were assigned and the order of heat-stress bouts, to evaluate that a similar number of groups were tested in each treatment across the season.

2) To account for body size variation, the authors only collected mussels of 51-82 mm shell-length. It would be good to show that there were no differences in size (mass or shell-length) between experimental groups. Systematic, involuntary bias (e.g. assigning the biggest individuals to one treatment) could have a profound effect in results, if body size influences survival probability. Also related to this, is it a way of including body size as covariate in your analyses? Chi-square tests and Kaplan-Meier survival curves might not allow including covariates. As an alternative for Kaplan-Meier, Cox-proportional hazard models (CoxPH models) allow to test for the effects of covariates, such as body size. However, if there are no differences in size between groups, these alternative analyses might yield the same results to those presented by the authors. Thus, I would suggest the authors to test for differences in size between groups.

3) In lines 246-248 the authors state that “the rapid heat acclimation response that [they] found in [their] study is contrary to previous work in mussels that assumed heat acclimation (in the sense of improved heat tolerance) takes upwards of two weeks to be completed.” I guess that that depends on how one defines acclimation. Many traits (e.g. critical thermal limits in amphibians) take several days to weeks to reach stable values when exposed to a constant temperature, or to reach similar values (e.g. metabolic rates) between temperatures. This makes sense because animals are not constantly “acclimatizing” to their thermal surroundings, but they might rather be acclimated to the median temperature (or such a thing). In the case of the present study, the authors test for the delayed effects of an acute heat stress in heat tolerance which might involve acute responses. The authors show that these responses (e.g. cellular stress response) might last for a considerable period, and they term this acclimation. I am not completely convinced of this response being “acclimation”, but I might be wrong.

4) It would be nice to be able to view a plot of field temperature data without having to search for it in a webpage.

## Decision letter (RSPB-2020-2561.R0)

11-Nov-2020

Dear Dr Moyen

I am pleased to inform you that your Review manuscript RSPB-2020-2561 entitled "A single heat stress bout induces rapid and prolonged heat acclimation in the California mussel, *Mytilus californianus*" has been accepted for publication in Proceedings B.

The referee(s) do not recommend any further changes. Therefore, please proof-read your manuscript carefully and upload your final files for publication. Because the schedule for publication is very tight, it is a condition of publication that you submit the revised version of your manuscript within 7 days. If you do not think you will be able to meet this date please let me know immediately.

To upload your manuscript, log into <http://mc.manuscriptcentral.com/prsb> and enter your Author Centre, where you will find your manuscript title listed under "Manuscripts with Decisions." Under "Actions," click on "Create a Revision." Your manuscript number has been appended to denote a revision.

You will be unable to make your revisions on the originally submitted version of the manuscript. Instead, upload a new version through your Author Centre.

Before uploading your revised files please make sure that you have:

1) A text file of the manuscript (doc, txt, rtf or tex), including the references, tables (including captions) and figure captions. Please remove any tracked changes from the text before submission. PDF files are not an accepted format for the "Main Document".

2) A separate electronic file of each figure (tiff, EPS or print-quality PDF preferred). The format should be produced directly from original creation package, or original software format. Please note that PowerPoint files are not accepted.

3) Electronic supplementary material: this should be contained in a separate file from the main text and the file name should contain the author's name and journal name, e.g. `authorname_procb_ESM_figures.pdf`

All supplementary materials accompanying an accepted article will be treated as in their final form. They will be published alongside the paper on the journal website and posted on the online figshare repository. Files on figshare will be made available approximately one week before the accompanying article so that the supplementary material can be attributed a unique DOI. Please see: <https://royalsociety.org/journals/authors/author-guidelines/>

4) Data-Sharing and data citation

It is a condition of publication that data supporting your paper are made available. Data should be made available either in the electronic supplementary material or through an appropriate repository. Details of how to access data should be included in your paper. Please see <https://royalsociety.org/journals/ethics-policies/data-sharing-mining/> for more details.

If you wish to submit your data to Dryad (<http://datadryad.org/>) and have not already done so you can submit your data via this link

<http://datadryad.org/submit?journalID=RSPB&manu=RSPB-2020-2561> which will take you to your unique entry in the Dryad repository.

If you have already submitted your data to dryad you can make any necessary revisions to your dataset by following the above link.

5) For more information on our Licence to Publish, Open Access, Cover images and Media summaries, please visit <https://royalsociety.org/journals/authors/author-guidelines/>.

Once again, thank you for submitting your manuscript to Proceedings B and I look forward to receiving your final version. If you have any questions at all, please do not hesitate to get in touch.

Sincerely,  
Dr Daniel Costa  
<mailto:proceedingsb@royalsociety.org>

Associate Editor Board Member: 1

Comments to Author:

I have now received comments from two specialists from this field. Both of them think that the study is interesting, the topic is timely, and the paper was well written. Nonetheless, they raised some minor concerns that the authors may want to fix before publication.

Reviewer(s)' Comments to Author:

Referee: 1

Comments to the Author(s)

This manuscript presents a well-conducted study of heat hardening in the intertidal mussel *Mytilus* on the California coast. The results of the study are highly relevant for making accurate predictions about the effects of heat waves on mussel populations. Additionally, the study presents an important lesson for any researchers interested in heat hardening, namely that there can be significant variation in heat hardening phenology depending on initial heat exposure.

Overall, the manuscript is well written and the study and data are presented in an ideal way for readers to follow. Fig 2A could potentially be a supplementary figure, but I am OK with leaving it in the main document of the paper as the number of figures is small.

Below I make some comments intended to help the paper be maximally impactful following publication.

Introduction Paragraph 1: I found the first paragraph to be a bit light on citations of recent examples that specifically address the importance of infrequent, but extreme, heat waves. I'd like to see the authors add more of those citations in this first paragraph. For example, Stillman (2019) presents a highly relevant review summarizing the critical importance of thermal extremes, or heat waves, in making predictions regarding responses to climate change. (<https://journals.physiology.org/doi/full/10.1152/physiol.00040.2018>). Brietenbach et al (2020) present a highly relevant concept about how the phenology of heat waves have differential impacts on phenotype (<https://royalsocietypublishing.org/doi/10.1098/rspb.2020.0992>). And I am presume that the authors will find additional citations that are likely to be equally relevant.

Introduction Paragraph 2: The authors use the term "heat hardening" as a keyword, but do not use this term anywhere in the manuscript, which is surprising, because long-term heat hardening is exactly what they demonstrate in their study. I would like to see the authors incorporate "heat hardening" into the text of their manuscript as this usage most precisely describes their study. I was surprised that the authors did not, in the second paragraph of the introduction, mention at least some of the recent literature showing heat hardening (albeit not in *Mytilus*).

Line 97 - how much shellfish diet was fed at each feeding? Is there a way to assess whether the mussels were getting a “natural” amount of food during the aquarium holding period?

Line 105-108 - When I first read this section, I wanted to see additional information here about the conditions of the heat exposures. I found the information after the subsequent paragraph starting at line 135. I suggest that the authors move the intervening paragraph (starting at line 113) to the discussion as this paragraph better fits a justification for the study design in terms of interpretation of results than a description of how the study was conducted.

Line 178. Move this sentence to the end of the statistical analysis section.

Paragraph at Line 227. In the first sentence, the “As shown in Fig. 3” is not needed - just cite Fig 3 at the end of the sentence. The second sentence is a methods sentence as no results are presented. The third sentence should also cite Fig. 3.

In the conclusions I'd like to challenge the authors to go a bit broader in terms of the importance of this study for considering the best ways in which heat hardening should be accounted for in experimental work and in making inferences about responses of populations to heat waves and climate change. The work, as presented, has implications more broadly than mussels alone.

Referee: 2

#### Comments to the Author(s)

In this study, the authors evaluate the patterns of thermal tolerance gain and loss of a sessile species (*Mytilus californianus*) after exposure to sublethal temperatures (25, 30 and 35°C). Further, they combine their results with long-term monitoring of operative temperatures in the field to put results in a “realistic” context. The authors show that exposure to heat pulses of 30 and 35°C leads to increased survival to later pulses of 40°C, but that temporal dynamics differ: 30°C heat-stress bouts increase survival between days 1 and 14, whereas 35°C bouts increased survival between days 2 and 28.

Overall, this is a beautiful piece of research. The general topic and research question are very timely - of interest for researchers in many fields - and clearly explained in the manuscript. The experimental design and statistical analyses are appropriate and allows the authors to answer the question being posed. However, I would like the authors to clarify a few points (all of them minor):

1) The order in which experimental groups (and sublethal temperatures) were tested should be better explained. Most experimental procedures are sufficiently explained in the text, but it is important to clarify how individual mussels were assigned to experimental groups. Apparently, the authors collected mussels from January to June. If I understand correctly, this means that they collected experimental groups of ~20 individuals gradually along those months. I am sure that the authors did not assign all the early groups to one sublethal temperature treatment (e.g. 25°C) and all late groups to another treatment (e.g. 35°C): this would have blurred results with potential seasonal acclimation from January to June. The authors should clarify how groups were assigned and the order of heat-stress bouts, to evaluate that a similar number of groups were tested in each treatment across the season.

2) To account for body size variation, the authors only collected mussels of 51-82 mm shell-length. It would be good to show that there were no differences in size (mass or shell-length) between experimental groups. Systematic, involuntary bias (e.g. assigning the biggest individuals to one treatment) could have a profound effect in results, if body size influences survival probability. Also related to this, is it a way of including body size as covariate in your analyses? Chi-square tests and Kaplan-Meier survival curves might not allow including covariates. As an alternative for Kaplan-Meier, Cox-proportional hazard models (CoxPH models) allow to test for

the effects of covariates, such as body size. However, if there are no differences in size between groups, these alternative analyses might yield the same results to those presented by the authors. Thus, I would suggest the authors to test for differences in size between groups.

3) In lines 246-248 the authors state that “the rapid heat acclimation response that [they] found in [their] study is contrary to previous work in mussels that assumed heat acclimation (in the sense of improved heat tolerance) takes upwards of two weeks to be completed.” I guess that that depends on how one defines acclimation. Many traits (e.g. critical thermal limits in amphibians) take several days to weeks to reach stable values when exposed to a constant temperature, or to reach similar values (e.g. metabolic rates) between temperatures. This makes sense because animals are not constantly “acclimatizing” to their thermal surroundings, but they might rather be acclimated to the median temperature (or such a thing). In the case of the present study, the authors test for the delayed effects of an acute heat stress in heat tolerance which might involve acute responses. The authors show that these responses (e.g. cellular stress response) might last for a considerable period, and they term this acclimation. I am not completely convinced of this response being “acclimation”, but I might be wrong.

4) It would be nice to be able to view a plot of field temperature data without having to search for it in a webpage.

## Decision letter (RSPB-2020-2561.R1)

17-Nov-2020

Dear Dr Moyen

I am pleased to inform you that your manuscript entitled "A single heat stress bout induces rapid and prolonged heat acclimation in the California mussel, *Mytilus californianus*" has been accepted for publication in Proceedings B.

You can expect to receive a proof of your article from our Production office in due course, please check your spam filter if you do not receive it. PLEASE NOTE: you will be given the exact page length of your paper which may be different from the estimation from Editorial and you may be asked to reduce your paper if it goes over the 10 page limit.

If you are likely to be away from e-mail contact please let us know. Due to rapid publication and an extremely tight schedule, if comments are not received, we may publish the paper as it stands.

If you have any queries regarding the production of your final article or the publication date please contact [procb\\_proofs@royalsociety.org](mailto:procb_proofs@royalsociety.org)

Your article has been estimated as being 9 pages long. Our Production Office will be able to confirm the exact length at proof stage.

### Open Access

You are invited to opt for Open Access, making your freely available to all as soon as it is ready for publication under a CC BY licence. Our article processing charge for Open Access is £1700.

Corresponding authors from member institutions

(<http://royalsocietypublishing.org/site/librarians/allmembers.xhtml>) receive a 25% discount to these charges. For more information please visit <http://royalsocietypublishing.org/open-access>.



#### Paper charges

An e-mail request for payment of any related charges will be sent out shortly. The preferred payment method is by credit card; however, other payment options are available.

#### Electronic supplementary material:

All supplementary materials accompanying an accepted article will be treated as in their final form. They will be published alongside the paper on the journal website and posted on the online figshare repository. Files on figshare will be made available approximately one week before the accompanying article so that the supplementary material can be attributed a unique DOI.

You are allowed to post any version of your manuscript on a personal website, repository or preprint server. However, the work remains under media embargo and you should not discuss it with the press until the date of publication. Please visit <https://royalsociety.org/journals/ethics-policies/media-embargo> for more information.

Thank you for your fine contribution. On behalf of the Editors of the Proceedings B, we look forward to your continued contributions to the Journal.

Sincerely,

Editor, Proceedings B

mailto: [proceedingsb@royalsociety.org](mailto:proceedingsb@royalsociety.org)
